# Supplementary material
Source: PubMed Central journal article supplement (PMC3574901)
Supplement: 1213857110_pnas.201213857SI.pdf [file 1213857110_pnas.201213857SI.pdf]

# Supporting Information

Horner et al. 10.1073/pnas.1213857110

## SI Materials and Methods

**Cell Washing Methodology.** To determine the validity of the cellular Cd isotope compositions, a series of tests examining the effect of cell washing were carried out. The purpose of cell washing is to remove Cd from cells that is not metabolically assimilated (e.g., passive adsorption to cell exterior; ref. 1). A series of cleaning agents were prepared and tested: 0.05 M trisodium citrate–0.075 M disodium EDTA, 0.85% NaCl–5 mM disodium EDTA, 100 mM disodium oxalate–50 mM disodium EDTA, 0.1 M HCl, 0.1 M EDTA, 0.42 M NaCl, and 18.2 MΩ H<sub>2</sub>O. To test the various cleaning agents, a Cd-free starter culture of *Escherichia coli* was grown (*Materials and Methods*) and then transferred to a 1-L container. Immediately (~10 s) following the addition of Cd, 50-mL aliquots of the culture were transferred to centrifuge vials, and the cultures were harvested (*Materials and Methods*). The pellets were resuspended in a cleaning agent, and the suspension was gently agitated for ~1 min. Following this, the cells were centrifuged again, 18.2 MΩ H<sub>2</sub>O was added, the cells were centrifuged again, and the final pellet was dried for weighing. The dry mass of recovered pellets for each cleaning agent is shown in Fig. S2. We find that all treatments lead to similar levels of recovery except for the citrate-EDTA treatment (~3.5 times less than the others). However, when the Cd content of each pellet is normalized by recovery mass (Fig. S3 and Table S2), we find that all treatments have essentially identical amounts of Cd present, except for the HCl treatment.

**Effect of Cell Washing on Subcellular Cd Isotope Compositions.** We also compared the Cd isotopic composition of subcellular isolates that were rinsed in HCl with those rinsed with 18.2 MΩ H<sub>2</sub>O (Fig. S4). We found that the total amount of Cd recovered (for a comparable mass of cells) was ~34 times lower, despite all other experimental conditions remaining the same. The partitioning of Cd within the cell was also modified by HCl rinsing, apparently causing a shift in the Cd load from cytosol to membranes (although the total amount of Cd present is lower). Furthermore, the isotopic composition of the membranes was seen to shift to more negative Cd isotopic compositions; but the cytosol remained unchanged. The shift in membrane Cd isotope compositions likely explains why more intense washing techniques led to more fractionated isotopic compositions in whole cells (Fig. 2; Fig. S5). We were unable to isolate Cd from CdCA1 in HCl-rinsed cells, implying that the cleaning techniques were damaging the cells and causing Cd to leak from the cytosol and membranes.

Collectively, the washing data suggest that the rapid uptake of Cd by the cells was not reversible adsorption, but instead reflects some sort of biologically mediated binding of Cd to the cell surface (2), as has been reported for Cu (3). Unlike Cu, however, this does not lead to Cd isotopic fractionation (Fig. 2), in agreement with the (limited) dataset of adsorbed Cd isotopic compositions (4, 5). Because cleaning with 18.2 MΩ H<sub>2</sub>O yielded similar Cd contents as the various cleaning agents tested (Fig. S2) but did not demonstrably attack the cells (e.g., HCl or citrate-EDTA mixtures; Fig. S1), we consider the H<sub>2</sub>O cleaning to be the most robust in assessing the true Cd isotopic composition of cells studied here.

1. Tang D, Morel FMM (2006) Distinguishing between cellular and Fe-oxide-associated trace elements in phytoplankton. *Mar Chem* 98(1):18–30.
2. Kenney JPL, Fein JB (2011) Importance of extracellular polysaccharides on proton and Cd binding to bacterial biomass: A comparative study. *Chem Geol* 286(3-4):109–117.
3. Navarrete JU, Borrok DM, Viveros M, Ellzey JT (2011) Copper isotope fractionation during surface adsorption and intracellular incorporation by bacteria. *Geochim Cosmochim Acta* 75(3):784–799.
4. Schmitt AD, Galer SJ, Abouchami W (2009) Mass-dependent cadmium isotopic variations in nature with emphasis on the marine environment. *Earth Planet Sci Lett* 277(1-2):262–272.
5. Horner TJ, et al. (2010) Ferromanganese crusts as archives of deep water Cd isotope compositions. *Geochim Geophys Geosyst* 11(4):Q04001.

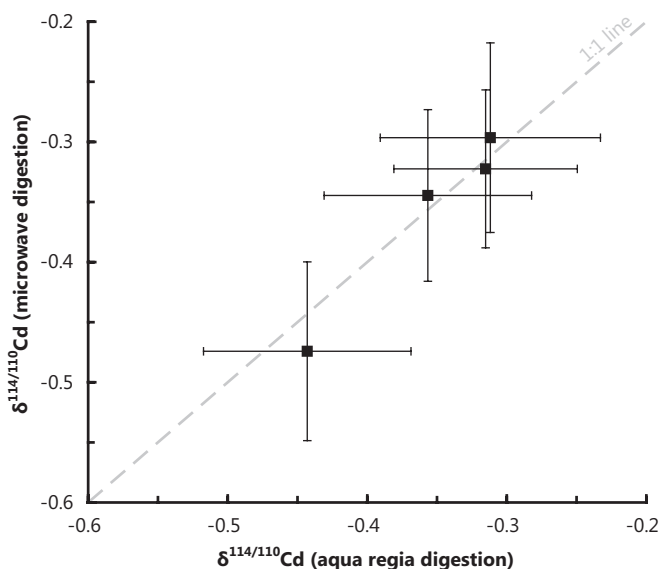

**Fig. S1.** Cell isotope compositions do not depend on the digestion method. Comparison of Cd isotope compositions for cells digested using the microwave treatment compared with those digested in aqua regia. The similarity of isotopic compositions indicates that the aqua regia digestion was sufficiently aggressive to liberate all Cd from cell organic matter.







**Table S3. Isotopic data for whole cell washing experiments**

| Experiment no. | IPTG (+/-)     | Washing                | [Cd] (ng Cd per mg dry pellet) | $\delta^{114/110}\text{Cd}$ | $\pm 2 \text{ SD}^*$ | $n^\dagger$ |
|----------------|----------------|------------------------|--------------------------------|-----------------------------|----------------------|-------------|
| CdCA03         | +              | 3× DI H <sub>2</sub> O | >2,000 (above calibration)     | -0.23                       | 0.13                 | 5           |
|                | -              |                        | >2,000 (above calibration)     | -0.07                       | 0.11                 | 4           |
| CdCA04         | - <sup>‡</sup> |                        | 1,842                          | +0.06                       | 0.13                 | 5           |
|                | -              |                        | 2,366                          | -0.16                       | 0.13                 | 6           |
|                | +              |                        | 2,957                          | -0.24                       | 0.13                 | 7           |
| CdCA05         | +              | 2× HCl                 | 2                              | -0.75                       | 0.32                 | 1           |
|                | +              |                        | <1                             | —                           | —                    | —           |
|                | -              |                        | <1                             | —                           | —                    | —           |
|                | -              |                        | 18                             | -1.04                       | 0.08                 | 1           |
| CdCA06         | +              | 1× HCl                 | 44                             | -0.43                       | 0.10                 | 5           |
|                | +              |                        | 326                            | -0.31                       | 0.08                 | 5           |
|                | -              |                        | 180                            | -0.32                       | 0.07                 | 5           |
|                | -              |                        | 129                            | -0.35                       | 0.08                 | 5           |
|                | +              | 1× HCl + extra rinse   | 193                            | -0.44                       | 0.07                 | 5           |
|                | +              |                        | 161                            | -0.52                       | 0.07                 | 5           |
|                | -              |                        | 74                             | -0.56                       | 0.07                 | 5           |
|                | -              |                        | 260                            | -0.36                       | 0.07                 | 5           |

IPTG, isopropyl- $\beta$ -D-1-thiogalactopyranoside.

\*Uncertainties reported as 2× SD of sample replicates (when  $n \geq 5$ ) or reproducibility of solution standards within the same analysis session, whichever is the larger of the two.

<sup>†</sup>Number of independent isotopic measurements.

<sup>‡</sup>Adsorption-only experiment (cells were harvested after ~10 s).

**Table S4. Isotopic data for intracellular separates**

| Experiment no. | IPTG (+/-) | Washing                | Cellular separate | $\delta^{114/110}\text{Cd}$ | $\pm 2 \text{ SD}$ | $n$ | Percent cellular Cd* | Percent cytosolic Cd <sup>†</sup> |
|----------------|------------|------------------------|-------------------|-----------------------------|--------------------|-----|----------------------|-----------------------------------|
| CdCA05         | +          | 1× DI H <sub>2</sub> O | CdCA1             | -0.67                       | 0.07               | 8   | —                    | —                                 |
| CdCA06         | +          | 1× DI H <sub>2</sub> O | Membranes         | -0.26                       | 0.05               | 5   | 68 ± 13              | —                                 |
|                |            |                        | Cytosol           | -0.03                       | 0.07               | 5   | 32 ± 13              | —                                 |
|                |            |                        | CdL <sup>‡</sup>  | -0.09                       | 0.06               | 5   | —                    | 98.7 ± 0.2                        |
|                |            |                        | CdCA1             | -0.59                       | 0.07               | 5   | —                    | 1.1 ± 0.3                         |
|                |            |                        | Denatured CdCA1   | +0.17                       | 0.05               | 2   | —                    | 0.13 ± 0.03                       |
|                |            | 1× 0.1 M HCl           | Membranes         | -0.49                       | 0.06               | 5   | 89.2 ± 1.7           | —                                 |
|                |            |                        | Cytosol           | +0.01                       | 0.06               | 2   | 10.6 ± 1.9           | —                                 |
|                |            |                        | CdL <sup>‡</sup>  | +0.23                       | 0.17               | 3   | —                    | ~100 <sup>§</sup>                 |

\*Percentage of total cellular Cd.

<sup>†</sup>Percentage of total cytosolic Cd.

<sup>‡</sup>CdL refers to nonspecifically bound Cd in the cytosol (i.e., eluted from the His-Bind column before tag cleavage).

<sup>§</sup>Other isolates (e.g., CdCA1) from the cells washed in HCl contained negligible Cd, such that the nonspecifically bound Cd was essentially the only component present in acid-cleaned cells.

**Table S5. Isotopic data for cell digestion experiments**

| Experiment no. | IPTG (+/-) | Cell washing               | $\delta^{114/110}\text{Cd}$ aqua regia |                    |     | $\delta^{114/110}\text{Cd}$ microwave |                    |     |
|----------------|------------|----------------------------|----------------------------------------|--------------------|-----|---------------------------------------|--------------------|-----|
|                |            |                            | digestion                              | $\pm 2 \text{ SD}$ | $n$ | digestion                             | $\pm 2 \text{ SD}$ | $n$ |
| CdCA06         | -          | 1× 0.1 M HCl               | -0.32                                  | 0.07               | 5   | -0.32                                 | 0.07               | 5   |
|                | +          |                            | -0.31                                  | 0.08               | 5   | -0.30                                 | 0.08               | 5   |
|                | -          | 1× 0.1 M HCl + extra rinse | -0.36                                  | 0.07               | 5   | -0.34                                 | 0.07               | 5   |
|                | +          |                            | -0.44                                  | 0.07               | 5   | -0.47                                 | 0.07               | 5   |
